# Supplementary figures and images for: En generell processkartläggning av leveransplanering för biobränsle i Sverige
Source: eLife journal article supplement (doi:10.7554/elife.44791), 2011-11-08

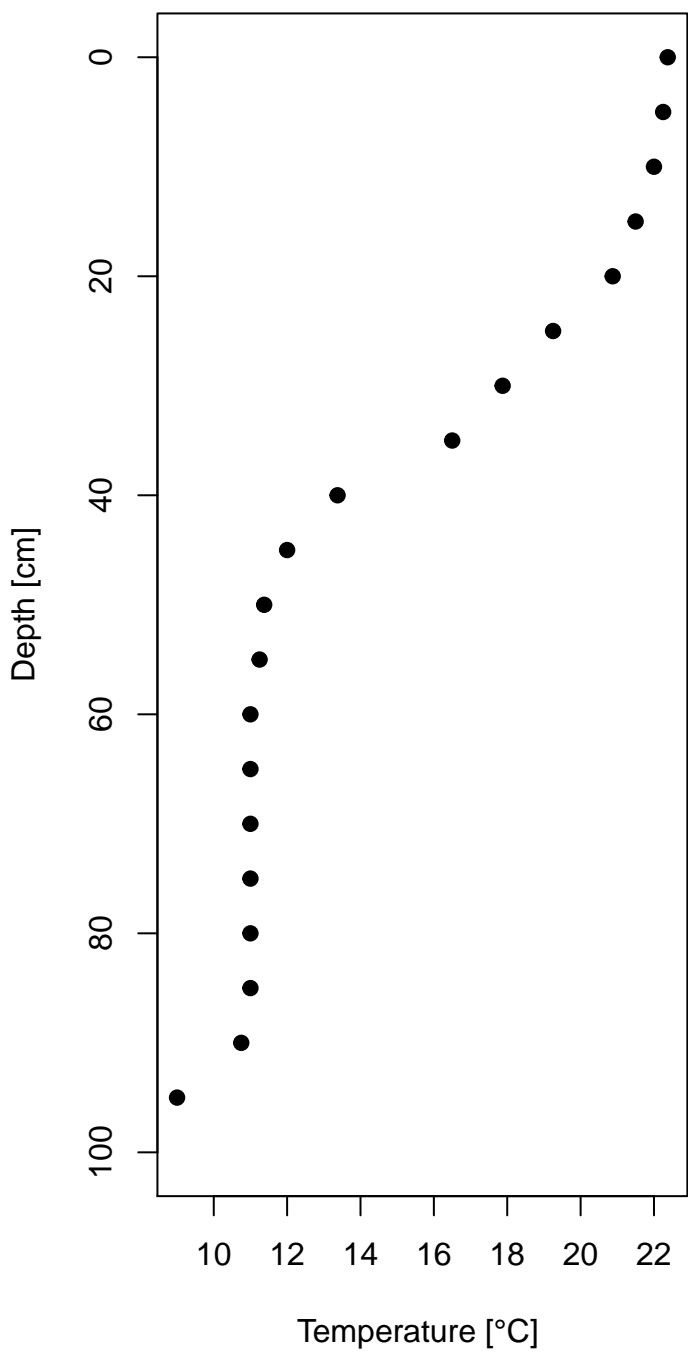

Supplement: supp [file elife-44791-supp-v1.zip]
